# Supplementary material for: Interaction Networks in Yeast Define and Enumerate the Signaling Steps of the Vertebrate Aryl Hydrocarbon Receptor
Source: PLoS Biol. 2004 Mar 16;2(3):e65. doi: 10.1371/journal.pbio.0020065 (PMC368161; doi:10.1371/journal.pbio.0020065)
Supplement: Table S4 — This table contains all of the AHR modifiers that were interconnected in the AHR–PIN (Dmax = 2). Also shown are their known gene names, products, gene descriptions, and GO annotations (Ashburner et al. 2000; Issel-Tarver et al. 2002). (24 KB XLS). [file pbio.0020065.st004.xls]

## Sheet: Sheet1
Table S4: M-nodes in core network of AHR-PIN (Dmax=2) (34x)
ORF	Symbol	Product	Description	biological_process	molecular_function	cellular_component
YBR024W	SCO2		Originally identified as a multicopy suppressor of a respiratory defective mutant; homolog of Sco1p	copper ion transport	molecular_function unknown	mitochondrial membrane
YBR058C	UBP14	ubiquitin-specific protease	Functional homolog of mammalian isopeptidase T; may facilitate proteolysis by preventing unanchored ubiquitin chains from competitively inhibiting polyubiquitin-substrate binding to the 26S proteasome	protein deubiquitination*	ubiquitin-specific protease activity	cytoplasm
YBR085W	AAC3	ADP/ATP translocator	highly homologous to PET9 (AAC2) and AAC1; expression occurs only under anaerobic conditions	ATP/ADP exchange	ATP/ADP antiporter activity	mitochondrial inner membrane
YBR279W	PAF1		RNA polymerase II-associated, nuclear protein that may serve as both a positive and negative regulator of a subset of genes, perhaps operating in parallel with Gal11p	RNA elongation from Pol II promoter	Pol II transcription elongation factor activity	transcription elongation factor complex
YDR162C	NBP2		interacts with Nap1, which is involved in histone assembly	biological_process unknown	molecular_function unknown	cellular_component unknown
YDR174W	HMO1	high mobility group (HMG) family	one of seven HMG-box proteins of Saccharomyces cerevisiae.	plasmid maintenance	RNA polymerase I transcription factor activity*	nucleus*
YDR392W	SPT3	histone acetyltransferase SAGA complex member|transcription factor	Transcription factor	pseudohyphal growth*	transcription cofactor activity	SAGA complex
YEL061C	CIN8		Kinesin-related protein involved in establishment and maintenance of mitotic spindle	mitotic chromosome segregation*	microtubule motor activity	kinesin complex*
YER155C	BEM2	rho GTPase activating protein (GAP)	Protein with role in bud emergence	cell wall organization and biogenesis*	signal transducer activity*	intracellular
YGR080W	TWF1	twinfilin A, an actin monomer sequestering protein	Twinfilin A is a member of a conserved family of actin monomer sequestering proteins. TWF1 is comprised almost entirely of two tandem repeats, each having sequence homology with cofilin (COF1).	polar budding*	actin monomer binding*	actin cortical patch (sensu Saccharomyces)
YGR252W	GCN5	histone acetyltransferase	functions in the Ada and SAGA (Spt/Ada) complexes to acetylate nucleosomal histones	histone acetylation*	histone acetyltransferase activity	SAGA complex
YHR041C	SRB2	RNA polymerase II holoenzyme/mediator subunit	RNA polymerase II holoenzyme/mediator subunit	transcription from Pol II promoter	RNA polymerase II transcription mediator activity	mediator complex
YHR171W	APG7		autophagy	protein-vacuolar targeting*	ubiquitin-like conjugating enzyme activity	cellular_component unknown
YHR178W	STB5		binds Sin3p in two-hybrid assay	response to xenobiotic stimulus	transcription factor activity	nucleus
YHR200W	RPN10	26S proteasome component|mammalian S5a protein homolog	homolog of the mammalian S5a protein, component of 26S proteasome	ubiquitin-dependent protein catabolism	endopeptidase activity	proteasome regulatory particle (sensu Eukarya)
YIL076W	SEC28	epsilon-COP coatomer subunit	Part of a heptameric protein complex that regulates retrograde Golgi-to-ER protein traffic in eukaryotic cells; coatomer forms the COP I vesicle coat whose functions are essential	ER to Golgi transport*	molecular_function unknown	COPI vesicle coat
YJL053W	PEP8	vacuolar protein similar to mouse gene H<beta>58	Plays a role in delivery of proteins to the vacuole	protein-Golgi retention*	molecular_function unknown	endosome
YJL124C	LSM1		Like Sm protein; the finding that Lsm1 contains the Sm consensus motifs and most closely resembles Sm-B has been controversial (Fromont-Racine et al, 1997 Nature Genetics 16:277-282, and Bertrand Seraphin, personal communication).	rRNA processing*	RNA cap binding	cytoplasmic mRNA processing body*
YJL176C	SWI3	transcription factor	transcription factor	chromatin modeling	general RNA polymerase II transcription factor activity	nucleosome remodeling complex*
YJR032W	CPR7	cyclophilin 40|peptidyl-prolyl cis-trans isomerase (PPIase)	a cyclophilin related to the mammalian CyP-40; physically interacts with RPD3 gene product	response to stress	chaperone activity*	cytosol
YJR035W	RAD26	DNA dependent ATPase|human Cockayne syndrome B gene ERCC6 homolog	May be involved in transcription-coupled DNA repair	nucleotide-excision repair*	DNA dependent ATPase activity	nucleus
YKL061W				biological_process unknown	molecular_function unknown	cellular_component unknown
YKL213C	DOA1	regulatory component of the proteasome pathway	Required for normal intracellular ubiquitin metabolism and for normal rates of proteolysis of ubiquitin-dependent proteolytic substrates in vivo	ubiquitin-dependent protein catabolism*	molecular_function unknown	cellular_component unknown
YKR048C	NAP1	nucleosome assembly protein I	nucleosome assembly protein I	nucleosome assembly*	protein binding	nucleus
YLR055C	SPT8	probable member of histone acetyltransferase SAGA complex|transcription factor	transcription factor, probable member of histone acetyltransferase SAGA complex	histone acetylation*	transcription cofactor activity	nucleus*
YLR342W	FKS1	1,3-beta-D-glucan synthase	Required for viability of calcineurin mutants	cell wall organization and biogenesis*	1,3-beta-glucan synthase activity	actin cap (sensu Saccharomyces)*
YMR092C	AIP1	actin cortical patch component	Protein localizes to actin cortical patches. Probable binding site on actin lies on front surface of subdomain 3 and 4.	response to osmotic stress*	actin filament severing activity	nucleus*
YMR142C	RPL13B	ribosomal protein L13B	Homology to rat L13	protein biosynthesis	structural constituent of ribosome	cytosolic large ribosomal subunit (sensu Eukarya)
YMR186W	HSC82	chaperonin	constitutively expressed heat shock protein	response to stress*	chaperone activity*	cellular_component unknown
YNR023W	SNF12	RSC chromatin remodeling complex Rsc6p subunit homolog|SWI/SNF transcription activation complex 73 kDa subunit	73 kDa subunit of the SWI/SNF transcription activation complex, homolog of Rsc6p subunit of the RSC chromatin remodeling complex	chromatin modeling	general RNA polymerase II transcription factor activity	nucleosome remodeling complex*
YOL050C
YOR027W	STI1	heat shock protein also induced by canavanine and entry into stationary phase	Heat shock protein also induced by canavanine and entry into stationary phase	protein folding	chaperone activity*	cytoplasm
YOR344C	TYE7	33 kDa|serine-rich protein, is a potential member of the bHLH/leucine-zipper protein family	may be involved in glycolytic gene expression	transcription*	transcription factor activity	nucleus
YPL226W	NEW1		This gene encodes a protein with an Q/N-rich amino terminal domain that acts as a prion, termed [NU]+.	biological_process unknown	ATP-binding cassette (ABC) transporter activity	cellular_component unknown
